P2664

## Long-term follow-up in a large cohort of survivors after out-of-hospital cardiac arrest: global mortality and comparison with age-specific mortality rate in the general population

J. Caro Codon<sup>1</sup>, L. Rodriguez Sotelo<sup>1</sup>, J.R. Rey Blas<sup>1</sup>, S.O. Rosillo Rodriguez<sup>1</sup>, O. Gonzalez Fernandez<sup>1</sup>, A. Iniesta Manjavacas<sup>1</sup>, E. Armada Romero<sup>1</sup>, J. Fernandez De Bobadilla<sup>1</sup>, J. Ruiz Cantador<sup>1</sup>, B. Casas Sanchez<sup>2</sup>, A. Rivas Perez<sup>1</sup>, L.A. Martinez Marin<sup>1</sup>, J.M. Garcia De Veas<sup>1</sup>, J.L. Lopez-Sendon<sup>1</sup>, E. Lopez-De-Sa<sup>1</sup>

<sup>1</sup>University Hospital La Paz, Department of Cardiology, Madrid, Spain; <sup>2</sup>Autonomous University of Madrid, Madrid, Spain

**Background:** Data regarding long-term clinical outcomes after out-of-hospital cardiac arrest (OHCA) are scarce.

**Purpose:** To assess long-term mortality rate in OHCA patients, compare it with the general population age-specific mortality rate and identify relevant predictive factors.

**Methods:** All consecutive patients admitted to the Acute Cardiac Care Unit after OHCA from August 2007 to January 2019 and surviving until hospital discharge were included. All patients received targeted-temperature management according to our local protocol. Stepwise regression techniques and Cox proportional hazards models were used to investigate clinical variables related to long-term survival. The study population was divided into four quartiles according to their age and their mortality rate was compared with age-specific data from the Spanish National Statistics Institute.

**Results:** The final analysis included 201 patients. Mean age was 57.6±14.2 years and 168 (83.6%) were male. The majority of patients experienced witnessed arrests related to shockable rhythms (176, 87.6%).

Median time to ROSC was 18 (IQR 12–27) minutes and 14 patients (7.0%) were discharged in a poor neurological condition (CPC 3–4). Thirty-six patients (17.9%) died after a median follow-up of 40.3 months (18.9–69.1). A prognostic multivariate Cox model was developed and is shown in Table 1. Mortality was mainly driven by neurologic (33%), cardiovascular (30.6%) and oncologic (30.6%) causes. Annual mortality rate per 1000 patients was statistically superior to that in the general population among the first three age quartiles: 18.08 (6.78–48.16) vs 0.64; 29.62 (12.33–71.16) vs 3.30; 63.07 (33.94–117.22) vs 7.77. Nevertheless, no significant differences were observed among the oldest patients, ranging from 68.6 to 90.7 years: 70.93 (43.45–115.78) vs 54.95.

**Conclusions:** OHCA survivors face significant mortality during follow-up, and its long term prognostic impact may be higher among younger patients. Age at the time of CA, time from CA to CPR, non-shockable rhythm, poor LVEF and poor neurological condition at discharge are independent predictors of long term mortality.

Table 1. Cox proportional hazard model

| Variable                         | Hazard Ratio | Std. Err. | p value | 95% Confidence Interval |
|----------------------------------|--------------|-----------|---------|-------------------------|
| Time from CA to CPR (per minute) | 1.06         | 0.03      | 0.06    | 1.00–1.13               |
| Non-shockable rhythm             | 2.93         | 1.11      | 0.01    | 1.39–6.16               |
| Poor LVEF at discharge (per %)   | 1.03         | 0.01      | 0.01    | 1.01–1.06               |
| Age at time of CA (per year)     | 1.04         | 0.01      | 0.01    | 1.01–1.06               |
| CPC 3–4 at hospital discharge    | 3.50         | 1.43      | <0.01   | 1.58–7.78               |

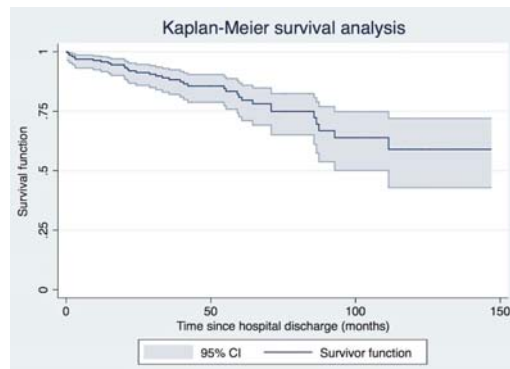

Figure 1
